# Supplementary material for: Identifying contexts and mechanisms in multiple behavior change interventions affecting smoking cessation success: a rapid realist review
Source: PubMed Central journal article supplement (PMC7291527; doi:10.1186/s12889-020-08973-2), 2020-06-12
Supplement: 12889_2020_8973_MOESM1_ESM.pdf [file 12889_2020_8973_MOESM1_ESM.pdf]

## Search Strategy for Medline

NB: Search strategies for the other databases were similar in structure, and used equivalent search terms and the same synonyms. Contact the corresponding author at [terri.rodak@camh.ca](mailto:terri.rodak@camh.ca) for the full search strategy for each database.

- 1 "Tobacco Use Disorder"/
- 2 "Tobacco Use"/
- 3 exp Smoking/
- 4 ((Cigar\* or tobacco or nicotine) adj5 (smoke\* or smoking or user\* or addict\* or depend\*)).ti,ab,kf,hw.
- 5 smoking.ti,ab,kf,hw.
- 6 smoking cessation/
- 7 ((Cigar\* or tobacco or nicotine) adj5 (cessation or quit\* or abstain\* or abstin\* or reduc\*)).ti,ab,kf,hw.
- 8 or/1-7 [smoking terms]
  
- 9 (multipl\* or several or "more than two" or additional or integrat\* or combin\* or concurrent or cooccur\* or co-occur\* or multifactorial or multi-factorial).ti,ab,kf,hw.
- 10 Health Behavior/
- 11 risk reduction behavior/
- 12 exp health promotion/
- 13 life style/
- 14 (health behavio?r\* or health risk behavio?r\*).ti,ab,kf,hw.
- 15 or/10-14 [health behaviour terms]
- 16 9 and 15 ["multiple" terms + health behaviour terms]
- 17 ((multipl\* or several or "more than two" or additional or integrat\* or combin\* or concurrent or cooccur\* or co-occur\* or multifactorial or multi-factorial) adj3 ((health\* or risk\* or lifestyle\* or "life style\*") adj3 (behavio?r\* or factor\*))).ti,ab,kf,hw.
- 18 (((multipl\* or several or "more than two" or addition\* or integrat\* or combin\* or concurrent or cooccur\* or co-occur\* or multifactorial or multi-factorial) adj3 ((behavio?r\* or lifestyle\* or "life style\*") adj3 (change\* or modif\*))).ti,ab,kf,hw.
- 19 or/16-18 [all multiple health behaviour terms]

- 20 exp alcohol drinking/
- 21 exp alcohol-related disorders/
- 22 exp alcoholic intoxication/
- 23 exp alcoholic beverages/
- 24 exp drinking behavior/
- 25 Alcohol\*.ti,ab,kf,hw.
- 26 (Alcohol\* adj3 (drink\* or consum\* or abus\* or intake)).ti,ab,kf,hw.
- 27 "alcohol use".ti,ab,kf,hw.
- 28 ((Heavy or hazardous or binge or excess\*) adj3 (drink\* or alcohol\*)).ti,ab,kf,hw.
- 29 (Alcohol\* adj3 (abstain\* or abstinen\* or detox\*)).ti,ab,kf,hw.
- 30 (beer or wine or cider or spirits or liquor).ti,ab,kf,hw.
- 31 or/20-30 [all alcohol terms]
  
- 32 exp Exercise/
- 33 exercise therapy/
- 34 physical fitness/
- 35 (Physical\* adj3 (activ\* or inactiv\* or fit or fitness or endur\*)).ti,ab,kf,hw. (119001)
- 36 Exerci\*.ti,ab,kf,hw.
- 37 (sport\* or walk\* or run\* or jog\* or bike\* or biking or bicycl\* or swim\* or aerobic\*).ti,ab,kf,hw.
- 38 Sedentar\*.ti,ab,kf,hw.
- 39 or/32-38 [all physical activity terms]
  
- 40 exp Diet/
- 41 Food habits/
- 42 feeding behavior/
- 43 food preferences/
- 44 nutrition therapy/
- 45 diet therapy/
- 46 Nutritio\*.ti,ab,kf,hw.
- 47 (Health\* adj3 (food\* or diet\* or eat\*)).ti,ab,kf,hw.
- 48 (Unhealth\* adj3 (food\* or diet\* or eat\*)).ti,ab,kf,hw.
- 49 (Fruit\* or Vegetable\*).ti,ab,kf,hw.

50 ((food\* or fat or fats or kalori\* or dietary) adj2 (intake or consum\*)).ti,ab,kf,hw.

51 (portion\* adj size\*).ti,ab,kf,hw.

52 or/40-51 [all healthy eating terms]

53 Stress, psychological/

54 Relaxation therapy/

55 ((emotion\* or life or psychologic\*) adj3 (stress\* or suffer\*)).ti,ab,kf,hw.

56 (Stress\* adj3 manag\*).ti,ab,kf,hw.

57 Relax\*.ti,ab,kf,hw.

58 Mindful\*.ti,ab,kf,hw.

59 Meditat\*.ti,ab,kf,hw.

60 53 or 54 or 55 or 56 or 57 or 58 or 59

61 (((posttraumatic or post-traumatic) adj1 stress\*) or ptsd).ti,ab,kf,hw.

62 60 not 61

63 stress test\*.ti,ab,kf,hw.

64 62 not 63 [stress terms]

65 exp Sleep/

66 exp Sleep Wake Disorders/

67 sleep\*.ti,ab,kf,hw.

68 insomnia\*.ti,ab,kf,hw.

69 or/65-68 [sleep terms]

70 (program\* or intervention\* or treat\* or modalit\* or trial\*).ti,ab,kf,hw.

71 dt.fs.

72 rh.fs.

73 th.fs.

74 pc.fs.

75 or/70-74 [intervention terms]

76 8 and 75 [smoking and intervention]

77 76 and 19 [smoking + MHB + intervention]

78 76 and 31 and 39 [smoking + alcohol + exercise + intervention]

- 79 76 and 31 and 52 [smoking + alcohol + nutrition + intervention]
- 80 76 and 31 and 64 [smoking + alcohol + stress + intervention]
- 81 76 and 31 and 69 [smoking + alcohol + sleep + intervention]
- 82 76 and 39 and 52 [smoking + exercise + nutrition + intervention]
- 83 76 and 39 and 64 [smoking + exercise + stress + intervention]
- 84 76 and 39 and 69 [smoking + exercise + sleep + intervention]
- 85 76 and 52 and 64 [smoking + nutrition + stress + intervention]
- 86 76 and 52 and 69 [smoking + nutrition + sleep + intervention]
- 87 76 and 64 and 69 [smoking + stress + sleep + intervention]
- 88 or/77-87 [all health behaviour intervention combinations]

89 (editorial or letter).pt.

90 88 not 89

91 limit 90 to yr="2005 -Current"

92 limit 91 to english language
